# Supplementary material
Source: HighWire-hosted journal article supplement (https://aim.bmj.com/content/35/5/316)
Supplement: inline-supplementary-material-1 [file inline-supplementary-material-1.pdf]

Online supplementary table S. The acupuncture points of each studies

| <b>Author</b> | <b>acupuncture points</b>                                |
|---------------|----------------------------------------------------------|
| Feng JX 2016  | GV14, GV20, other Ashi points on Governor Vessel         |
| Liu LM 2015   | CV12, ST36, PC6                                          |
| Wang Y 2015   | CV17, CV13, CV12, CV10, BL20, BL21, LR14, ST36, PC6, LR3 |
| Xiang YM 2014 | CV22, CV13, CV12, CV10, ST25, CV6, PC6, ST36, LR3        |
| Zhang YF 2013 | ST36                                                     |
| Zhang 2012a   | ST36, CV12, PC6, LR3, SP4                                |
| Zhang2012b    | ST36, CV12, PC6LR3, SP4                                  |
| Yu DH 2011    | PC6, LR3, CV12, ST36                                     |
| Lan AZ 2008   | PC6, ST36, CV12, BL20, BL21                              |
| Liu XH 2007   | PC6, SP4, GB34                                           |
| Guo Y 2007    | ST36, CV12, BL21                                         |
| Dickman 2007  | CV12, CV17, PC6, ST36, LR3, SP9                          |
